# Supplementary material for: Acute and endothelial-specific Robo4 deletion affect hematopoietic stem cell trafficking independent of VCAM1
Source: PubMed Central journal article supplement (PMC8362960; doi:10.1371/journal.pone.0255606), 2021-08-13

# Figure S1

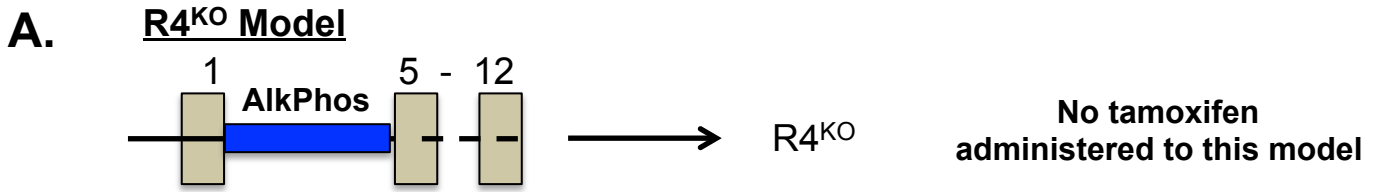

**B. Tamoxifen injection Schedule**

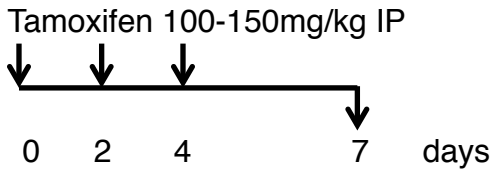

Wt control  
or  
R4<sup>cKO</sup>  
or  
R4<sup>ECcKO</sup>

**C. R4<sup>cKO</sup> or R4<sup>ECcKO</sup> Model**

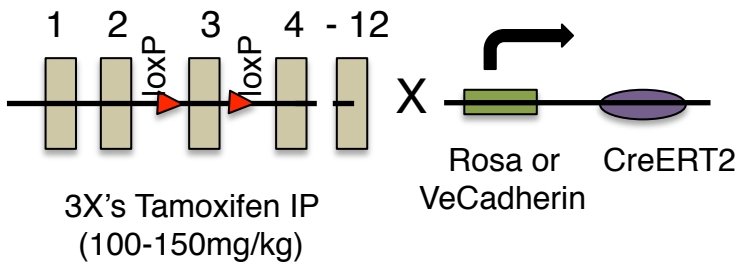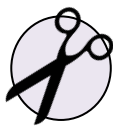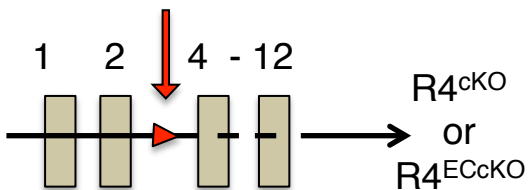

**Di.**

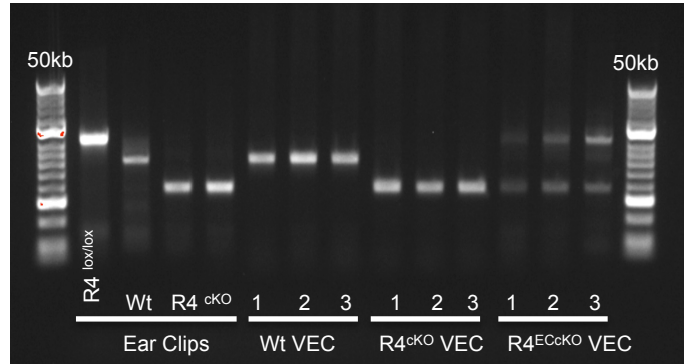

**Dii.**

**Robo4 (VEC)**

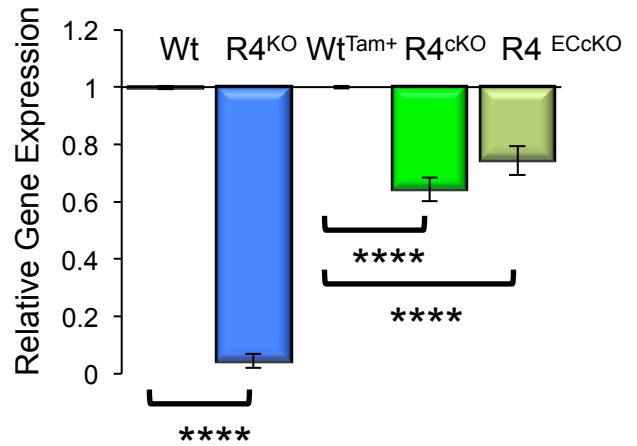

**Diii.**

**Robo4 (HSC)**

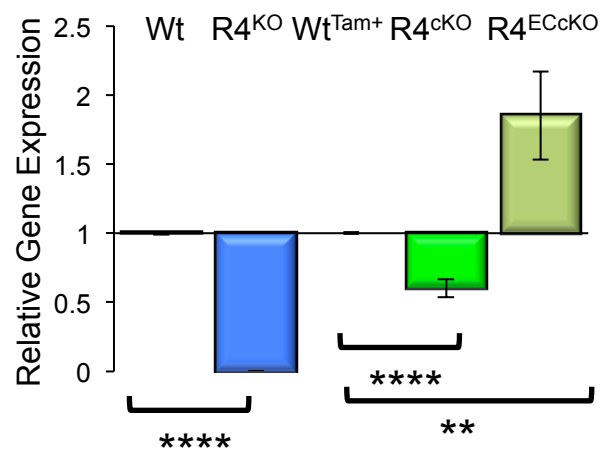

Supplement: pone.0255606.s001.pdf [file pone.0255606.s001.pdf]
