# Supplementary material for: Acute and endothelial-specific Robo4 deletion affect hematopoietic stem cell trafficking independent of VCAM1
Source: PubMed Central journal article supplement (PMC8362960; doi:10.1371/journal.pone.0255606), 2021-08-13

**Figure S2**

**A.**

**MSC**

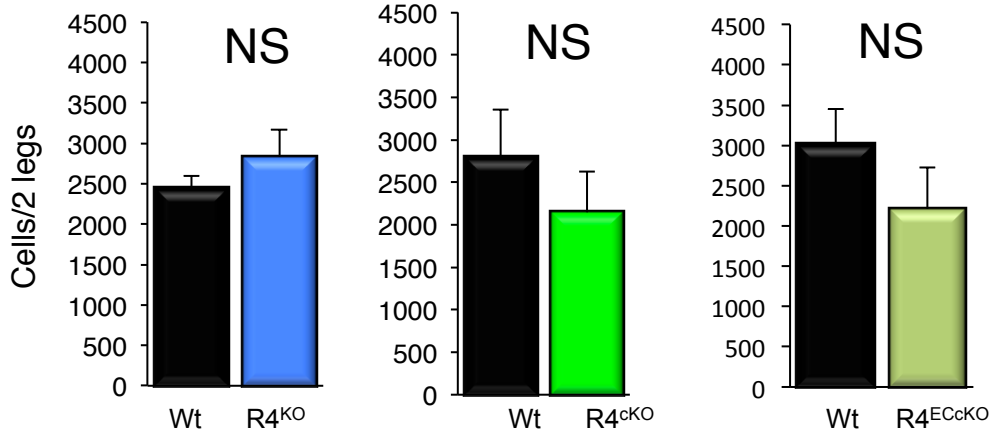

**B.**

**OBL**

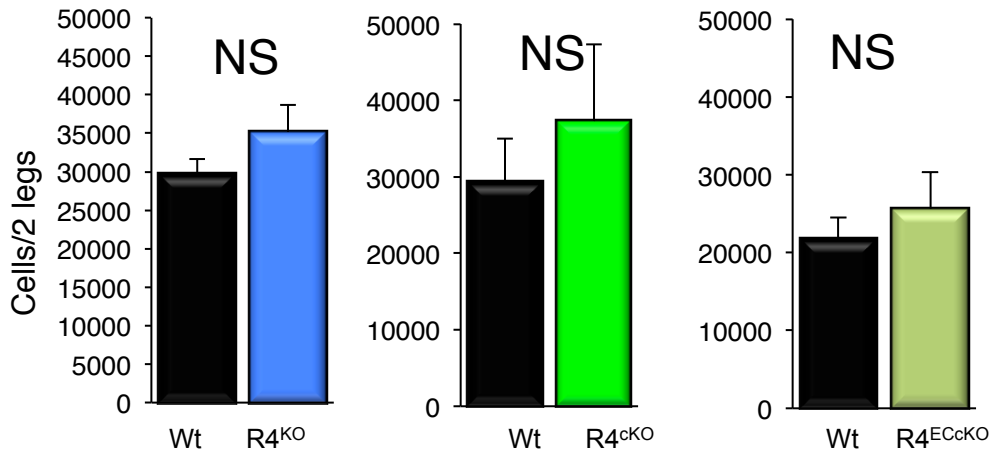

**C.**

**CD45<sup>+</sup>**

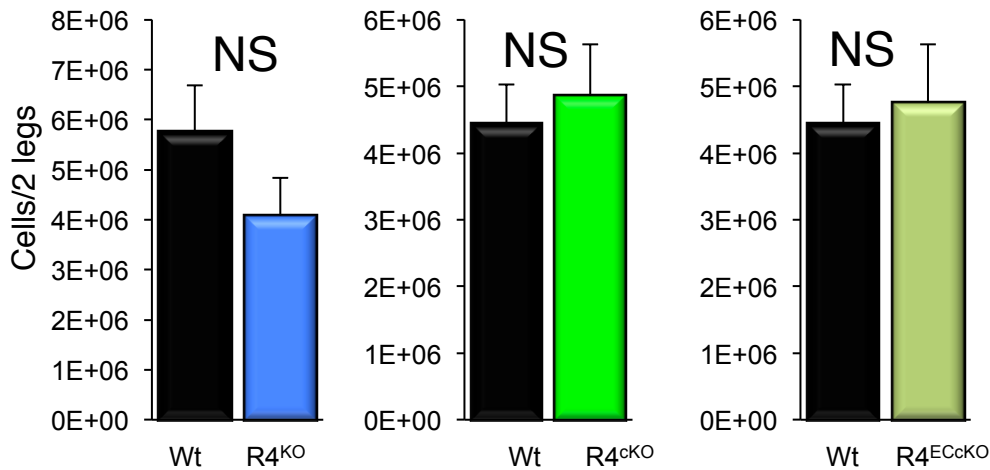

Supplement: pone.0255606.s002.pdf [file pone.0255606.s002.pdf]
