# Supplementary material for: Acute and endothelial-specific Robo4 deletion affect hematopoietic stem cell trafficking independent of VCAM1
Source: PubMed Central journal article supplement (PMC8362960; doi:10.1371/journal.pone.0255606), 2021-08-13

# Figure S4

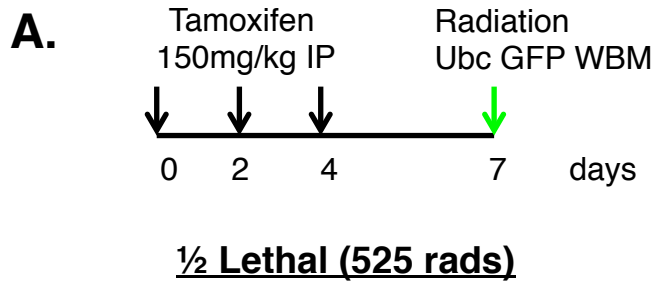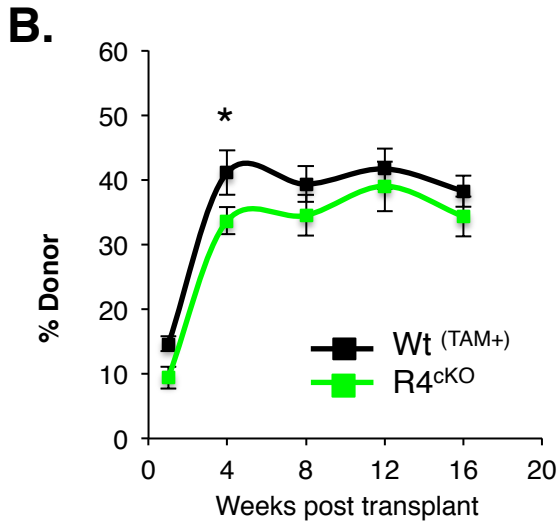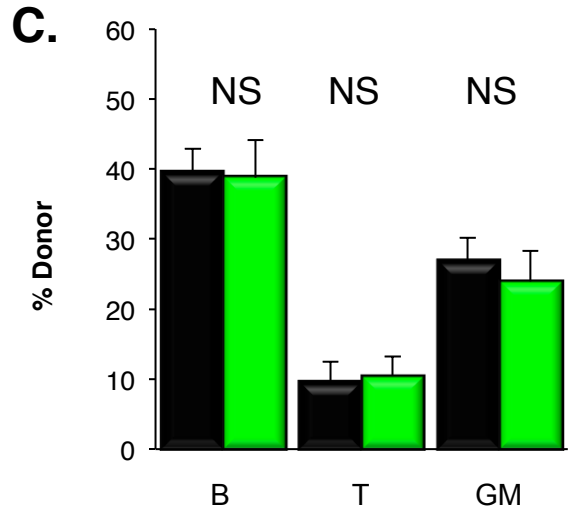

Supplement: pone.0255606.s004.pdf [file pone.0255606.s004.pdf]
